# Supplementary figures and images for: The Interaction between Four Polymorphisms and Haplotype of ABCB1, the Risk of Non-Small Cell Lung Cancer, and the Disease Phenotype
Source: Hindawi journal article supplement (doi:10.1155/2023/7925378), 2023-01-24

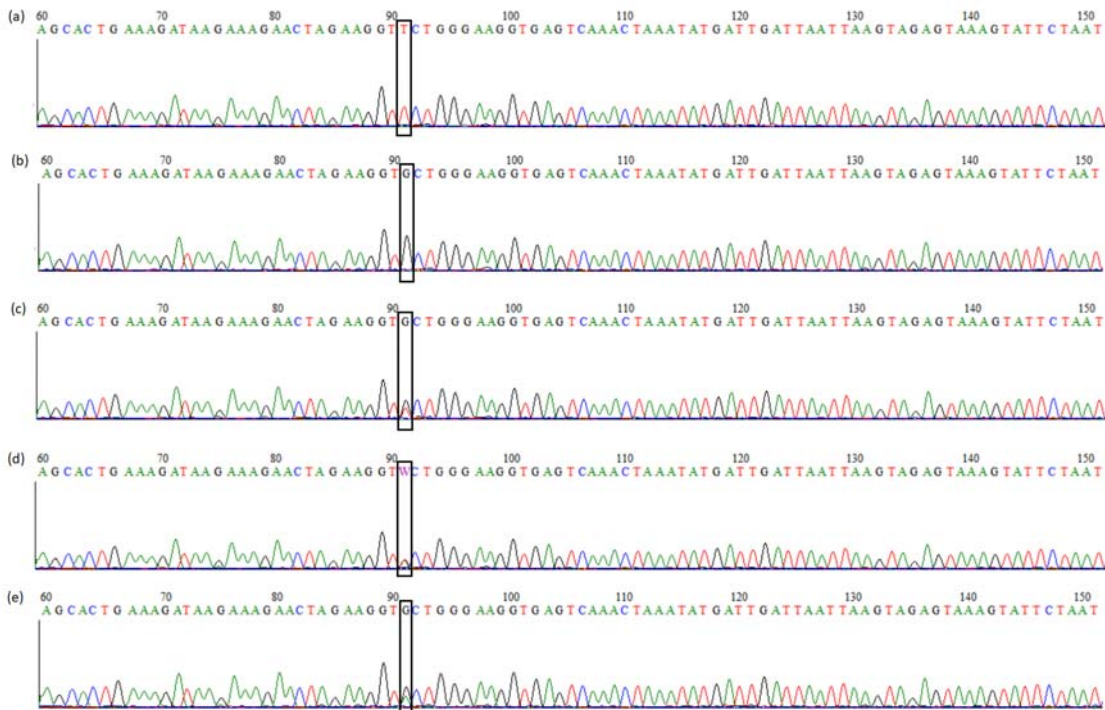

Supplement: f1 [file 7925378.f1.zip]

(a)

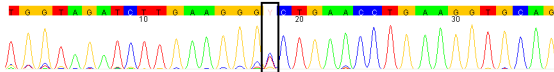

(b)

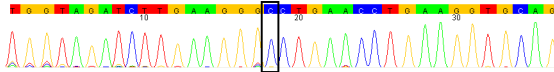

(c)

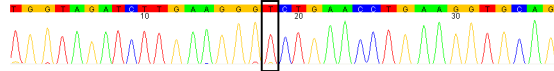

Supplement: f1 [file 7925378.f1.zip]
